# Supplementary material
Source: MDPI journal article supplement (https://www.mdpi.com/2073-4344/10/6/711)
Supplement: s1 [file s1]

# **Photocatalytic Nanofiltration Membrane using Zr-MOF/GO Nanocomposite with High-Flux and Anti-Fouling Properties**

**Rina Heu<sup>1,2</sup>, Mohamed Ateia<sup>3,\*</sup>, Chihiro Yoshimura<sup>1</sup>**

<sup>1</sup> Department of Civil and Environmental Engineering, Tokyo Institute of Technology, 2-12-1-M1-4 Ookayama, Tokyo 152-8552, Japan. heu.r.aa@m.titech.ac.jp (R.H.); yoshimura.c.aa@m.titech.ac.jp (C.Y.)

<sup>2</sup> Faculty of Hydrology and Water Resources Engineering, Institute of Technology of Cambodia, Phnom Penh 12156, Cambodia.

<sup>3</sup> Department of Chemistry, Northwestern University, Evanston, Illinois 60208, United States of America.

\* Correspondence: ateia@northwestern.edu

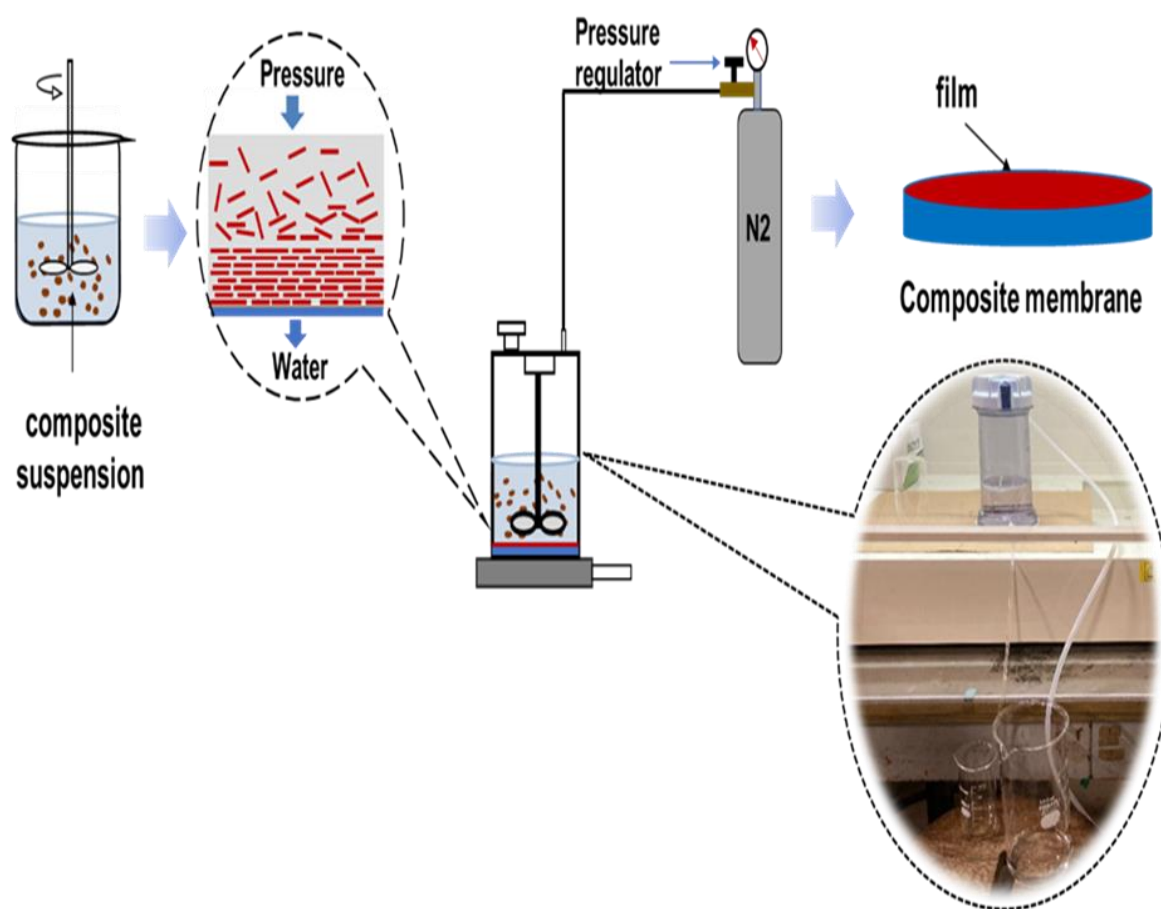

**Figure S1.** Schematic diagram of the preparation of UiO-66\_GO/NF membrane using a lab-scale dead-end filtration system.

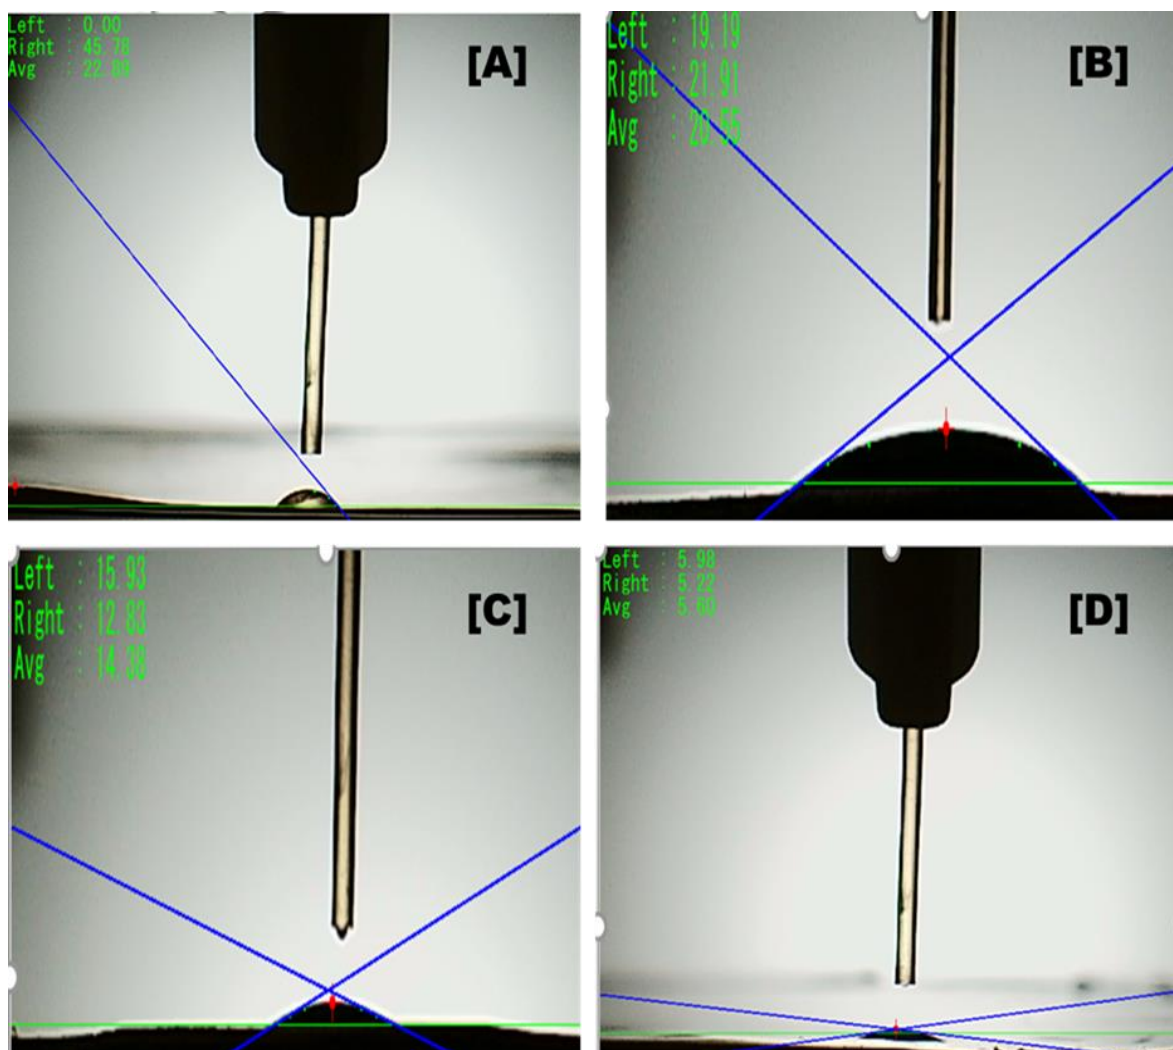

**Figure S2.** Water contact angle measurement of [A] pristine NF, and [B] 5%, [C] 10%, and 15% of UiO-66\_GO loading in composite membranes.

[A]

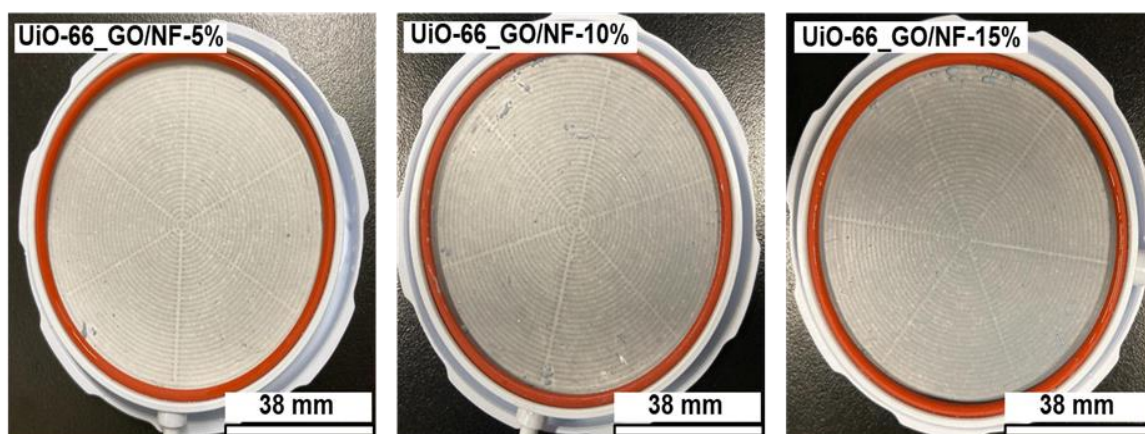

[B]

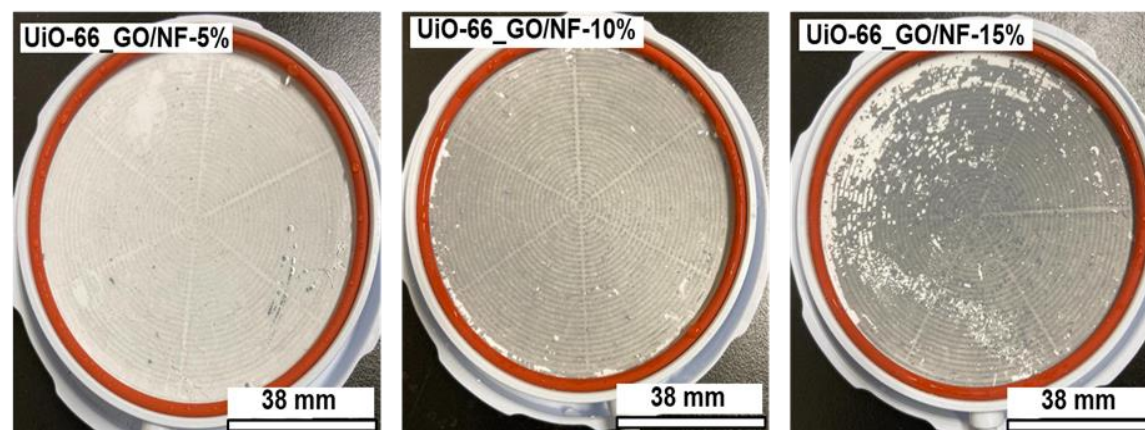

**Figure S3.** Images of the composite membrane [A] before and [B] after washing five times.
